# Supplementary material for: Method of predicting splice sites based on signal interactions.
Source: Springer Nature journal article supplement (doi:10.1186/1745-6150-1-10), 2006-01-01
Supplement: Additional file 1 [file 1745-6150-1-10-s1.pdf]

# Supplemental materials

## 1 Detected putative enhancing motifs

### 1.1 Acceptor ISE elements

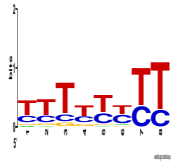

CCTTTCTT, CTTCTCTT, CTTTCCTT, CTTTCTTT, TCTGTCTT,  
TTCCTCTT, TTCCTTTT, TTGCTCTT, TTTCCCTT, TTTCTCTT,  
TTTGTATT, TTTTCATT, TTTTCCTT, TTTTCTCC

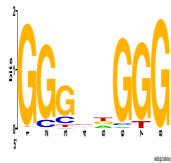

GAAGTGGG, GCTCAGGG, GCTCTGGG, GCTTTGGG, GGGACCAA,  
GGGACCCT, GGGAGAAA, GGGAGAGG, GGGAGATG, GGGAGGGG,  
GGGGTGGG, TTCCAGGG, TTCCTGGG

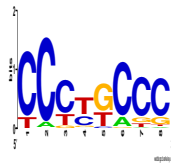

CAGGCACC, CAGGCAGG, CAGGGCCC, CCCAGCCC, CCCCTCCC,  
CCCCTCCT, CCCTGACC, CCCTGAGG, CCCTGCCC, CCCTGCCT,  
CCCTGCTC, CCCTGCTG, CCCTGGAA, CCTCTCCC, CCTCTCTC,  
CCTCTCTG, TCCAGCCC, TCCCTCCC, TCCTGAGG, TCCTGCCC,  
TCCTGCCT, TCTCTCCC

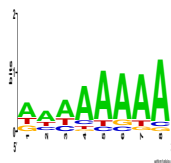

AAAAAAAA, AAAGAAAA, AGAAAAAA, GCCCTGGA, GCCCTGGG,  
 GCCCTGTC, GCCCTGTG, GCCTCCCA, GCCTCCTC, GCCTCCTG,  
 GGAAAAAA, GGAGAAAA, TTAAAAAA

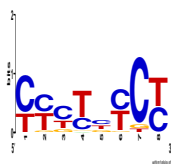

CCCTCCCC, CCCTCCCT, CCCTCTCC, CCCTCTCT, CCCTGTCT,  
 CCCTTCCC, CCTCTCCT, CCTCTTCC, CCTCTTCT, CCTTCCCC,  
 CCTTCTCC, CCTTCTCT, CCTTGCCC, CCTTGTCC, CTCCACCC,  
 CTCCTCCC, CTCCTTCC, CTCTCCCC, CTCTCTCC, CTCTCTCT,  
 CTCTGCCC, CTCTGCCT, CTCTGTCC, CTCTGTCT, CTCTTCCC,  
 CTGTCCCC, CTGTCTCC, CTGTCTCT, CTGTGTCC, CTTCTCCC,  
 TCCTCCCC, TCCTCTCC, TCCTGTCT, TCCTTCCT, TCTTCTCT,  
 TGCTCTCC, TTCCTCCC, TTCTCCCT, TTCTCTCT, TTCTGCCT,  
 TTGTCTCT, TTGTGTCT

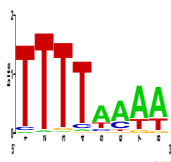

AAAAAGAA, AAAACAAA, TTCTAAAA, TTGTAAAA, TTGTTCTT,  
 TTGTTTTT, TTTACAAA, TTTCCAAA, TTTTAAAA, TTTTAGAA,  
 TTTTGAAA, TTTTGTCA, TTTTGTTT, TTTTCTT, TTTTTCAT,  
 TTTTTTTA, TTTTTTTT

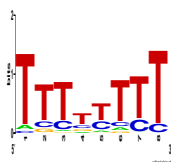

TCTCCTTT, TCTCTTTT, TCTGTTTT, TCTTCTTT, TCTTTTTT,  
 TGTCCCTT, TGTGTTTT, TGTTCCTT, TGTTTTTT, TTATTTTT,  
 TTCATTTT, TTCTCTTT, TTCTTTCT, TTCTTTTT, TTTATTCT,  
 TTTATTTT, TTTCCATT, TTTCCCTT, TTTCTTTC, TTTCTTTT,  
 TTTGCTTT, TTTGTTCT, TTTGTTTT, TTTTATTT, TTTTCTCT,  
 TTTTCTTT, TTTTATT, TTTTGT, TTTTCT, TTTTTC

## 1.2 Donor ISE elements

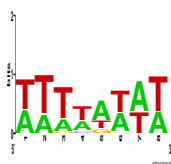

AAAAAAAAA, AAAAATTT, AAAATTTT, AAATAAAA, AAATAAAT,  
 AAATATAA, AAATATTT, AAATGAAA, AAATTTTT, AAGAAAAA,  
 AAGAATTT, AAGATTTT, AATAAAAA, AATAATTT, AATTAAAA,  
 AATTAAAT, AATTATTT, ATTA AAAA, ATTATTTT, ATTTAAAA,  
 ATTTAAAT, ATTTATTT, TAAAAAAA, TTTAAAAA, TTTAAAT,  
 TTTAATAA, TTTAATTT, TTTATTAA, TTTATTAT, TTTATTTT,  
 TTTCAAAA, TTTCAAAT, TTTCATTT, TTTGTTAT, TTTGTTTT,  
 TTTTAAAA, TTTTAAAT, TTTTATAA, TTTTATTT, TTTTGAAA,  
 TTTTGAAT, TTTTGTTT

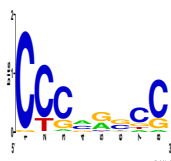

CCATTTCC, CCCACCCC, CCCACCTG, CCCACTCC, CCCAGAAA,  
 CCCAGAAG, CCCAGACC, CCCAGAGC, CCCAGCCC, CCCAGCTG,  
 CCCAGGAA, CCCAGGAG, CCCAGGCC, CCCAGGGC, CCCAGGTG,  
 CCCACCCC, CCCACTG, CCCAGAG, CCCAGCC, CCCAGGC,  
 CCCCTTCC, CCTCACCC, CCTCAGCC, CTGGGACC, CTGGGAGC,  
 CTGGGCCC, CTGGGCTG, CTGGGGAA, CTGGGGAG, CTGGGGCC,  
 CTGGGGGC, GTGGGGCC, GTGGGGGC

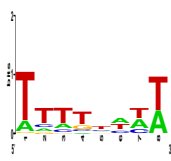

AAAAGAAA, AAAGAAAA, AAAGATTT, AAAGGAAA, AAGGAAAA,  
 AAGGGAAA, AGAAGAAA, AGAGAAAA, AGAGGAAA, TCTAGAAA,  
 TCTCTCTT, TCTCTTTT, TCTTCCTT, TCTTCTCT, TCTTCTTT,  
 TCTTTCCT, TCTTTCTT, TCTTTGTT, TCTTTTCT, TCTTTTTT,  
 TGAGGAAA, TTCCTTTT, TTCTCCTT, TTCTCTCT, TTCTCTTT,  
 TTCTTAAA, TTCTTCCT, TTCTTCTT, TTCTTGTT, TTCTTTCT,  
 TTCTTTTT, TTGGAAAA, TTTAGAAA, TTTCTAAA, TTTCTCCT,  
 TTTCTCTT, TTTCTTCT, TTTCTTTT, TTTTCCCT, TTTTCCTT,  
 TTTTCTCT, TTTTCTTT, TTTTAAAA, TTTTTCCT, TTTTCTT,  
 TTTTGT, TTTTCT, TTTTTTTT

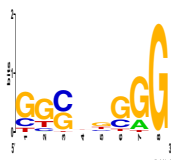

CAGGCGGG, CTCCTGGG, CTCTGCAG, CTCTGCTG, CTCTGGGG,  
 CTCTGTGG, CTTCTGGG, GGCCTGGG, GGCTGCAG, GGCTGCTG,  
 GGCTGGGG, GGCTGTGG, GGGAAAGG, GGGAACAG, GGGAAAGG,  
 GGGAGCAG, GGGAGGGG, GGGAGTGG, GGGATGGG, GGGGCCAG,

GGGGCGGG, GGGTGCAG, GGTCTGGG, TCCCTGGG, TCCTGCAG,  
 TCCTGCTG, TCCTGGGG, TCCTGTGG, TCTCTGGG, TTCCTGGG

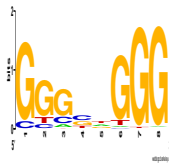

CCCCAGGG, CCCCTGGG, CCCTGGGG, CCTCTGGG, CTGCTGGG,  
 CTGGAGGG, CTGGTGGG, CTGTGGGG, GCCCAGGG, GCCCTGGG,  
 GCCTGGGG, GGAAGGGG, GGACAGGG, GGACTGGG, GGAGAGGG,  
 GGAGCTGG, GGAGTGGG, GGCCAGGG, GGGCAGGG, GGGCTGGG,  
 GGGGAGGG, GGGGCAGG, GGGGCCGG, GGGGCCTG, GGGGCTGG,  
 GGGGTGGG, GGGTGGGG, GGGTGTGG, GTGCAGGG, GTGCTGGG,  
 GTGGAGGG, GTGGTGGG, GTGTGGGG

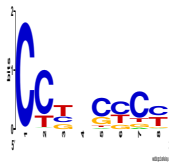

CCCAGCAC, CCCAGCCT, CCCAGCTC, CCCAGCTT, CCCAGGCA,  
 CCCAGGCT, CCCTCCCC, CCCTCCCT, CCCTCTCC, CCCTCTCT,  
 CCCTCTGC, CCCTCTGG, CCCTCTTC, CCTCCCCC, CCTCCCCT,  
 CCTCCTCT, CCTCCTGC, CCTCCTGG, CCTCCTTC, CCTCTGCC,  
 CCTCTGCT, CCTGAGCC, CCTGAGCT, CCTGCCAC, CCTGCCCC,  
 CCTGCCCT, CCTGCCTC, CCTGCTCC, CCTGCTCT, CCTGCTGG,  
 CCTGCTTC, CCTGGCAC, CCTGGCCC, CCTGGCCT, CCTGGCTC,  
 CCTGGGCC, CCTGGGCT, CCTTCCCC, CCTTCCCT, CCTTCCTC,  
 CCTTCTCT, CCTTCTGC, CCTTCTGG, CCTTCTTC, CTGCCCAC,  
 CTGCCCCA, CTGCCCCC, CTGCCCCT, CTGCCCTC, CTGCCTCC,  
 CTGCCTCT, CTGCCTGC, CTGCCTGG, CTGCCTTC, CTGCTCCC,  
 CTGCTGCC, CTGCTGCT

### 1.3 ESE elements

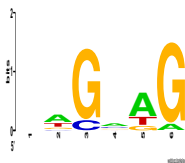

AAGGAG, ATGAAG, ATGCTG, ATGGAG, CTGAAA, GAGAAA,  
 GAGAAG, GAGGAA, GAGGAG, GCCTGG, TGGAAG, TGGCTG,  
 TGGGAG

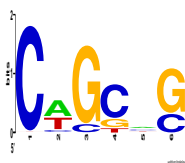

CAGCCC, CAGGAG, CTGCCC

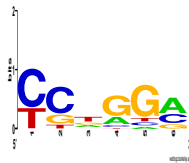

CCAGCC, CCAGGC, CCATCC, CCTGCC, CCTGGC, TGGAGC,  
TGGATG, TTCCAG, TTCCTG, TTTGGA, TTTGGC

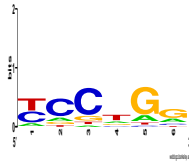

ACCAGG, ACCTGC, ACCTGG, ATGCAA, ATGCTT, ATGGCA,  
CAAGAC, CAAGCA, CAGCTT, CAGGAA, CAGGCA, CATCAC,  
CATCTC, CATCTT, CCCAGC, CCCTGC, TCAGCA, TCCAGA,  
TCCAGC, TCCAGG, TCCTGA, TCCTGC, TCCTGG, TCCTGT,  
TGCAGG, TGCTGT, TGGGAA

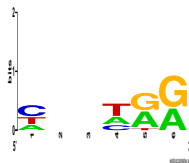

AAGAAA, AAGAAG, AAGATG, CAGAAG, CCCTGA, CCCTGG,  
CTTCAG, CTTTGA, CTTTGG, TGATGA, TGATGG, TGCTGA

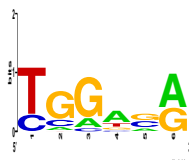

CAGACA, CAGAGG, CAGTGG, CCACCA, CCAGCA, TGCTGG,  
TGGACA, TGGAGG, TGGCCA, TGGTGG, TTCTGG

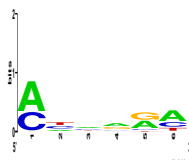

AAAAGA, AAAAGG, AAAAGT, AAACAA, AAACAC, AAAGAC,  
AAAGTA, ACCAGA, ACCAGT, AGCAGA, AGCAGG, AGCAGT,  
ATCAGA, ATCAGT, ATGGAA, ATGGAC, ATGGTA, ATTCAA,  
ATTCAC, ATTGAA, ATTGAC, ATTGTA, ATTTCC, ATTTCT,  
ATTTGA, CCAAGA, CCAAGG, CCAAGT, CCAGAC, CCAGTA,

CCCAGG, CCCAGT, CCCCAA, CCCCAC, CCGGAA, CCGGAC,  
 CCGGTA, CCTCAA, CCTCAC, CCTTCC, CCTTCT, CCTTGA,  
 CTCAGA, CTGGAC, CTTCAA, CTTCAC, CTTTCC, CTTTCT,  
 TGCAGA

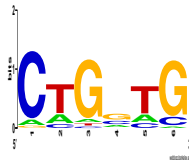

AAGCTG, AAGGTG, ATGCAG, ATGGTG, CAAGTG, CAGATG,  
 CAGCAG, CAGCTG, CAGGCC, CAGGTG, CCAGTG, CCCATG,  
 CCTCAG, CCTGTG, CTGAAG, CTGACC, CTGATG, CTGCAA,  
 CTGCAG, CTGGAG, CTGGCC, CTGGTG, CTGTCC, CTGTTG,  
 GAGATG, GAGCAG, GAGCTG, GAGGTG

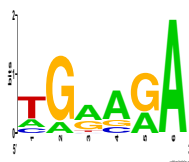

AGAAAA, AGAAGA, AGACAA, AGGAAA, AGGAGA, AGGCAA,  
 CACAGA, CACCAA, CAGAAA, CAGAGA, CATCAA, CATGAA,  
 CATGGA, TGA AAA, TGAAGA, TGACAA, TGAGAA, TGAGGA,  
 TGGAAA, TGGAGA, TGGCAA

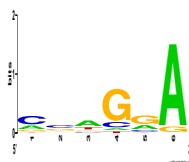

AAAGAA, AAAGGA, AGAGAA, AGAGGA, CAAGAA, CAAGGA,  
 CCAGAA, CCAGGA, CCCAAA, CCCACA, CCCAGA, CCCTCA,  
 CCTCCA, CCTCTG, CCTGAA, CCTGGA, CTGCCA, CTGCTG,  
 CTGGAA, CTGGGA, GGAGAA, GGAGGA, TCCTCA, TCTGGA,  
 TTGCCA, TTGCTG, TTGGGA
